# Supplementary material
Source: Springer Nature journal article supplement (https://www.springermedizin.de/resource/supplementary/12889_2012_4826_MOESM3_ESM.pdf/9494506)

Period ratio (1996-2010/1981-1995)

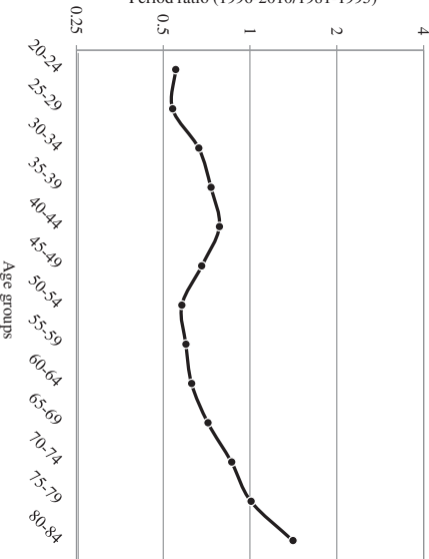

Supplement: MOESM3 [file 9494506]
